# Supplementary material for: Inhibition of Bacterial Quorum Sensing by Extracts from Aquatic Fungi: First Report from Marine Endophytes
Source: MDPI journal article supplement (doi:10.3390/md12115503), 2014-11-19
Supplement: s1 [file s1]

## Supplementary Information

**Figure S1.** Neighbour-joining (Kimura-2 parameter model) phylogenetic tree based on ITS sequences (552 nt) of isolates of this study and strains belonging to culture-collection. Accession numbers are given in parentheses. Numbers at the nodes are bootstrap support values ( $\geq 50\%$ ) for 1000 replicates. The scale bar indicates the number of substitutions per site.

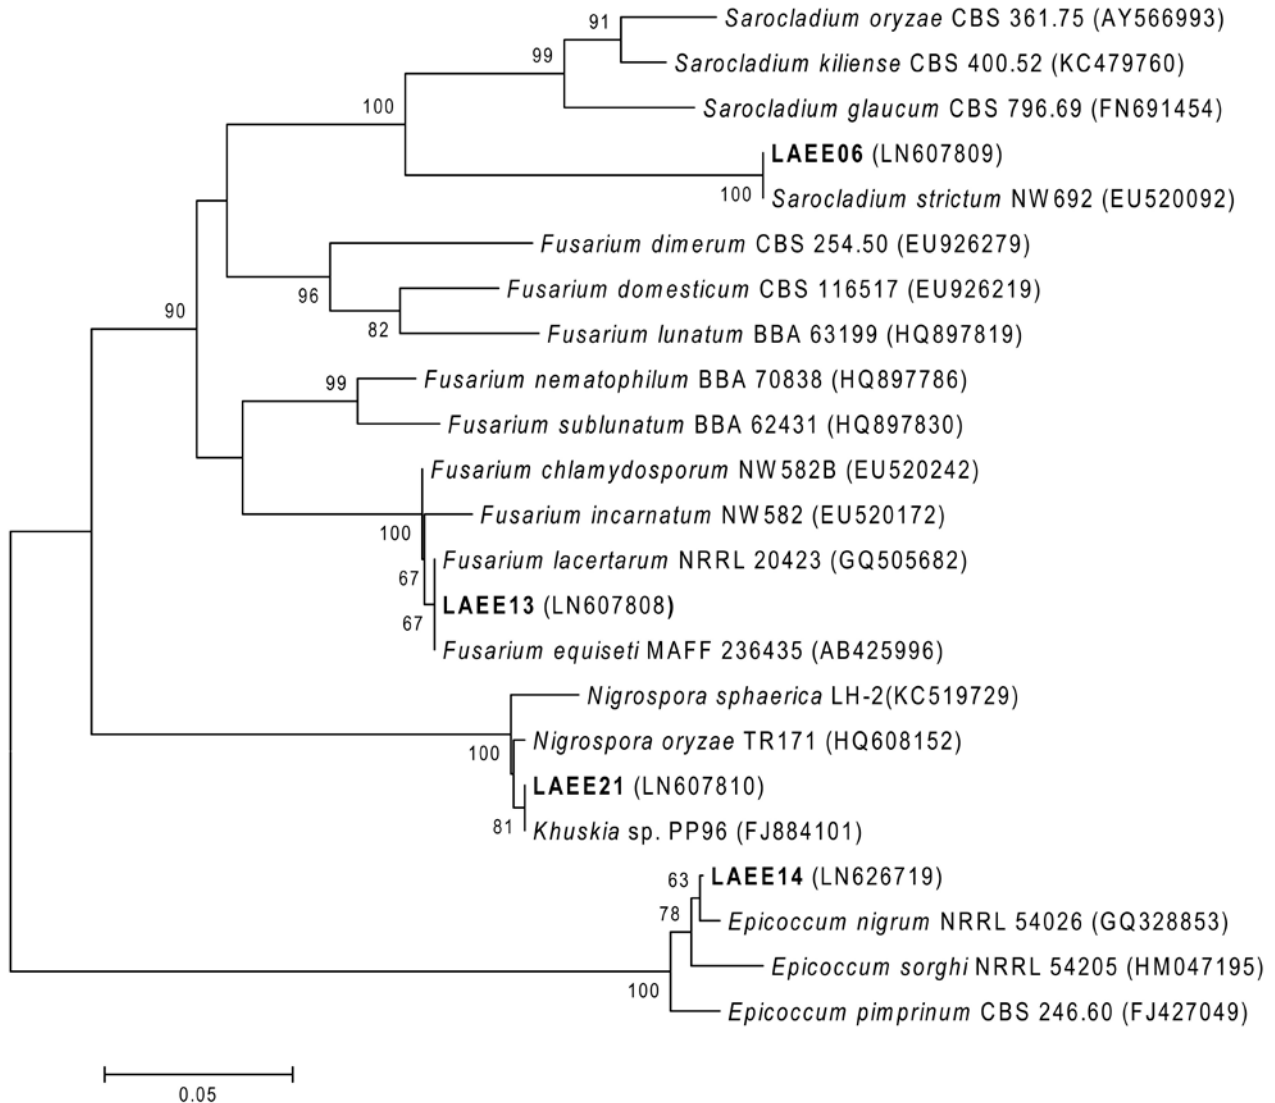

© 2014 by the authors; licensee MDPI, Basel, Switzerland. This article is an open access article distributed under the terms and conditions of the Creative Commons Attribution license (<http://creativecommons.org/licenses/by/4.0/>).
